# Supplementary material
Source: Research Square preprint supplement (doi:10.21203/rs.3.rs-10044070/v1)
Supplement: Supplementary file 2 [file da8e6df4c5117d0bfc87949e.xlsx]

## Sheet: Content
Table of Contents	Title
Supplementary Table 1	Univariate and bivariate causal mixture modelling of PHQ-9, PHQ-2 and MDD (MiXeR results)
Supplementary Table 2	Polygenic risk score analyses in Generation Scotland and UK Biobank

## Sheet: 1 MiXeR
Supplementary Table 1: Univariate and bivariate causal mixture modelling of PHQ-9, PHQ-2 and MDD Column descriptors: Pi (mean): Mean estimate of polygenicity (fraction of variants with casual effects) across MiXeR model interations Pi (SD) : Standard deviation of estimate of polygenicity across MiXeR model interations Sig2 beta: Discoverability (average phenotypic variance explained per causal va…
A) Univariate MiXeR analyses
Trait	Pi (mean)	Pi (SD)	Sig2 beta (mean)	Sig2 beta (SD)	Sig2 zero (mean)	Sig2 zero (SD)	h2 (mean)	h2 (SD)	nc@p9 (mean)	nc@p9 (SD)	AIC	BIC
PHQ-9	0.00365636	0.000202819	1.01676e-05	5.45195e-07	1.07549	0.00362677	0.0768663	0.00134588	11660.6	646.813	26.9761	17.3494
PHQ-2	0.00433133	0.000224284	6.33938e-06	2.88858e-07	1.10184	0.00342137	0.0568032	0.000765709	13813.1	715.269	55.5906	45.9639
MDD	0.00401663	7.87e-05	7.52e-06	1.41e-07	1.36778	0.00684306	0.0625851	0.000503253	12809.5	250.978	816.066	806.624
B) Bivariate MiXeR analyses
trait1	trait2	Dice (mean)	Dice (SD)	Pi trait1 (mean)	Pi trait1 (SD)	Pi trait2 (mean)	Pi trait2 (SD)	Pi Shared (mean)	Pi Shared (SD)	nc trait1 @p9 (mean)	nc trait1 @p9 (SD)	nc trait2 @p9 (mean)	nc trait2 @p9 (SD)	nc Shared @p9 (mean)	nc Shared @p9 (SD)	Rho zero (mean)	Rho zero (SD)	Rho beta (mean)	Rho beta (SD)	rg (mean)	rg (SD)	Fraction concordant within shared (mean)	Fraction concordant within shared (SD)	Best vs min AIC	Best vs min BIC	Best vs max AIC	Best vs max BIC
PHQ-9	PHQ-2	0.915344	0.0283063	4.69e-07	1.1e-06	0.000675431	0.000223513	0.0036559	0.000202547	1.49656	3.49705	2154.03	712.81	11659.1	645.948	0.506431	0.00259511	0.995732	0.0114237	0.914819	0.0203001	0.987623	0.0267743	-1.56283	-11.1895	-1.89757	-11.5242
PHQ-9	MDD	0.901206	0.0385161	0.00019902	0.000203129	0.00055929	0.000160974	0.00345734	0.000180051	634.699	647.801	1783.64	513.364	11025.9	574.203	0.150254	0.00207667	0.910848	0.0393182	0.820625	0.00536889	0.868838	0.0345467	1.95389	-7.48776	0.477547	-8.96411
PHQ-2	MDD	0.945574	0.0312222	0.000387137	0.000230994	7.24e-05	6.94e-05	0.00394419	0.000110749	1234.62	736.667	231.035	221.458	12578.5	353.19	0.185164	0.00224956	0.846623	0.0285966	0.800443	0.00507731	0.822204	0.0181363	6.40865	-3.033	-0.144151	-9.58581

## Sheet: 2 PRS
Supplementary Table 2: Polygenic risk score analyses in Generation Scotland and UK Biobank Column descriptors: pheno: MDD phenotype being predicted prs: GWAS used to create polygenic risk score SNP weights estimate: Beta (log(odds ratio)) estimate from logistic regression of MDD phenotype on the PRS se: Standard error of estimate t: t-statistic of estimate p: p-value of estimate OR: odds ratio fr…
A) Polygenic Prediction in Generation Scotland
pheno	prs	estimate	se	t	p	OR	OR_CI_lower	OR_CI_upper	r2_liability
MDD_SCID	PHQ-9	0.262991	0.0214406	12.266	1.37819e-34	1.30082	1.24728	1.35665	0.0212846
MDD_SCID	PHQ-2	0.240393	0.0213698	11.2492	2.33706e-29	1.27175	1.21958	1.32615	0.017827
MDD_SCID	PHQ2_meanof8_220k	0.261085	0.0214121	12.1933	3.37313e-34	1.29834	1.24498	1.35399	0.0209874
MDD_SCID	PHQ2_meanof8_440k	0.292592	0.0216029	13.5441	8.5839e-42	1.3399	1.28435	1.39785	0.0260246
MDD_SCID	PHQ9_MWB_160k	0.210029	0.0213493	9.83774	7.74279e-23	1.23371	1.18315	1.28643	0.0135405
MDD_SCID	PHQ2_MWB_160k	0.167666	0.0213224	7.86339	3.73876e-15	1.18254	1.13414	1.23301	0.00859711
MDD_CIDI	PHQ-9	0.214106	0.0302343	7.08157	1.42531e-12	1.23875	1.16748	1.31438	0.0140045
MDD_CIDI	PHQ-2	0.183485	0.0300959	6.09666	1.08306e-09	1.2014	1.13258	1.2744	0.0103409
MDD_CIDI	PHQ2_meanof8_220k	0.20176	0.0302236	6.67558	2.46259e-11	1.22355	1.15318	1.29823	0.0124139
MDD_CIDI	PHQ2_meanof8_440k	0.228746	0.0303661	7.53294	4.96087e-14	1.25702	1.18439	1.33411	0.0158515
MDD_CIDI	PHQ9_MWB_160k	0.168117	0.0301359	5.57863	2.42421e-08	1.18307	1.11522	1.25506	0.00862668
MDD_CIDI	PHQ2_MWB_160k	0.108155	0.0300266	3.60196	0.000315821	1.11422	1.05054	1.18176	0.00359089
MDD_DSM	PHQ-9	0.235664	0.0193356	12.1881	3.59921e-34	1.26575	1.21868	1.31464	0.0168777
MDD_DSM	PHQ-2	0.208919	0.0192736	10.8397	2.2325e-27	1.23235	1.18666	1.27979	0.0132947
MDD_DSM	PHQ2_meanof8_220k	0.235721	0.0193305	12.1942	3.33682e-34	1.26582	1.21876	1.3147	0.0168736
MDD_DSM	PHQ2_meanof8_440k	0.268278	0.0194966	13.7603	4.41916e-43	1.30771	1.25868	1.35865	0.021586
MDD_DSM	PHQ9_MWB_160k	0.191051	0.0192713	9.91374	3.62819e-23	1.21052	1.16565	1.25712	0.0110754
MDD_DSM	PHQ2_MWB_160k	0.144374	0.0192306	7.50754	6.0251e-14	1.15532	1.11258	1.19969	0.00631624
MDD_EHR	PHQ-9	0.264451	0.0263968	10.0183	1.26691e-23	1.30272	1.23703	1.37189	0.021903
MDD_EHR	PHQ-2	0.242262	0.0263215	9.20394	3.45057e-20	1.27413	1.21006	1.34159	0.0184081
MDD_EHR	PHQ2_meanof8_220k	0.240149	0.0263295	9.12089	7.4508e-20	1.27144	1.20749	1.33877	0.0180675
MDD_EHR	PHQ2_meanof8_440k	0.268339	0.0265324	10.1136	4.80635e-24	1.30779	1.24152	1.3776	0.0222758
MDD_EHR	PHQ9_MWB_160k	0.186661	0.0262952	7.09867	1.25965e-12	1.20522	1.14468	1.26896	0.0108388
MDD_EHR	PHQ2_MWB_160k	0.173084	0.0263189	6.57643	4.81891e-11	1.18897	1.12919	1.25191	0.00927422
MDD_ANY	PHQ-9	0.2618	0.0179886	14.5536	5.53857e-48	1.29927	1.25426	1.34589	0.0203389
MDD_ANY	PHQ-2	0.22631	0.0179	12.643	1.22241e-36	1.25396	1.21073	1.29874	0.0152573
MDD_ANY	PHQ2_meanof8_220k	0.249244	0.0179531	13.8831	8.02401e-44	1.28306	1.23869	1.32901	0.0184618
MDD_ANY	PHQ2_meanof8_440k	0.276341	0.0180948	15.2718	1.17855e-52	1.3183	1.27236	1.36589	0.0224077
MDD_ANY	PHQ9_MWB_160k	0.202213	0.0178832	11.3074	1.20545e-29	1.22411	1.18195	1.26778	0.0121454
MDD_ANY	PHQ2_MWB_160k	0.162433	0.0178358	9.10712	8.45962e-20	1.17637	1.13596	1.21822	0.007833
B) Polygenic Prediction in UKB - 10x 10% bootstapped samples for each scale
pheno	prs	estimate	se	t	p	OR	CI_lower_OR	CI_upper_OR	r2_liability	sample	N
UKB_MDD	PHQ9	0.200289	0.018519	10.8153	2.91351e-27	1.22176	1.1782	1.26692	0.012196	1	21494
UKB_MDD	PHQ9	0.196961	0.0182957	10.7654	5.01372e-27	1.2177	1.1748	1.26215	0.0117738	2	21555
UKB_MDD	PHQ9	0.228035	0.0183543	12.4241	1.93404e-35	1.25613	1.21174	1.30214	0.0156949	3	21543
UKB_MDD	PHQ9	0.206551	0.0185468	11.1367	8.31213e-29	1.22943	1.18554	1.27494	0.0130685	4	21504
UKB_MDD	PHQ9	0.203651	0.0182917	11.1335	8.6193e-29	1.22587	1.1827	1.27062	0.0125838	5	21510
UKB_MDD	PHQ9	0.196195	0.0184364	10.6417	1.90575e-26	1.21676	1.17358	1.26154	0.0118611	6	21502
UKB_MDD	PHQ9	0.24675	0.0184719	13.3581	1.06207e-40	1.27986	1.23435	1.32705	0.0185807	7	21501
UKB_MDD	PHQ9	0.211079	0.0184793	11.4224	3.23013e-30	1.23501	1.19108	1.28056	0.0136178	8	21494
UKB_MDD	PHQ9	0.188002	0.01847	10.1788	2.46524e-24	1.20684	1.16393	1.25133	0.0107787	9	21511
UKB_MDD	PHQ9	0.214046	0.0184269	11.616	3.41804e-31	1.23868	1.19474	1.28423	0.013951	10	21503
UKB_MDD	PHQ2	0.185604	0.0184921	10.0369	1.04886e-23	1.20394	1.16109	1.24838	0.0104794	1	21494
UKB_MDD	PHQ2	0.160704	0.0182112	8.82448	1.09973e-18	1.17434	1.13316	1.21701	0.00788001	2	21555
UKB_MDD	PHQ2	0.188093	0.0182834	10.2876	8.01131e-25	1.20695	1.16446	1.25098	0.0106925	3	21543
UKB_MDD	PHQ2	0.161455	0.0184873	8.73332	2.47299e-18	1.17522	1.1334	1.21859	0.00799329	4	21504
UKB_MDD	PHQ2	0.177508	0.0182663	9.7178	2.53194e-22	1.19424	1.15224	1.23777	0.00955625	5	21510
UKB_MDD	PHQ2	0.181286	0.0184526	9.82445	8.83573e-23	1.19876	1.15618	1.24291	0.0100721	6	21502
UKB_MDD	PHQ2	0.226245	0.0184437	12.2668	1.36621e-34	1.25388	1.20936	1.30004	0.0155604	7	21501
UKB_MDD	PHQ2	0.178739	0.0184415	9.69224	3.25301e-22	1.19571	1.15326	1.23972	0.00978912	8	21494
UKB_MDD	PHQ2	0.161489	0.0184264	8.76401	1.88423e-18	1.17526	1.13357	1.21848	0.00796053	9	21511
UKB_MDD	PHQ2	0.186655	0.0183692	10.1613	2.95102e-24	1.20521	1.16259	1.24939	0.0106693	10	21503
pheno	prs	Mean_OR	mean_CI_lower_OR	mean_CI_upper_OR	mean_r2_liability
UKB_MDD	PHQ9	1.23264	1.18907	1.27815	0.0134106
UKB_MDD	PHQ2	1.19815	1.15593	1.24233	0.0100653
